# Supplementary material for: Utility of Obesity Indicators for Predicting Hypertension among Older Persons in Limpopo Province, South Africa
Source: MDPI journal article supplement (doi:10.3390/app12094697), 2022-05-07
Supplement: s1 [file s1]

**QUESTIONNAIRE****PROJECT TITLE**

Utility of Obesity Indicators for Predicting Hypertension among Older Persons  
in Limpopo Province, South Africa

**Greetings to employees,**

"Thank you for agreeing to participate in this study. This study is about obesity indicators for predicting hypertension among South African older persons. The questionnaire is divided into personal information, demographic information, lifestyle factors, physical measurements and medical history. We are starting with measuring weight, height, waist and hip circumferences. Thereafter, we will ask you questions to fill the answers for the personal, demographic, behavioural and medical information. Ms MC Salane and Prof P Modjadji will do all the measurements and ask you questions. Feel free to indicate if you do not understand any question or if you want to withdraw from the study.

| Location and date                | Response |
|----------------------------------|----------|
| Mobile number/alternative number |          |
| Village name                     |          |
| Interviewer name and number      |          |
| Interview date                   |          |

|                             |        |
|-----------------------------|--------|
| 1.1. Age(years)             |        |
| 1.2. Date of birth (ddmmyy) |        |
| 1.3. Place of birth         |        |
| 1.4. Gender                 | Male   |
|                             | Female |

| Blood pressure reading        |  |              |  |
|-------------------------------|--|--------------|--|
| 1.5. Blood pressure reading 1 |  | Heart rate 1 |  |
| 1.6. Blood pressure reading 2 |  | Heart rate 2 |  |
| 1.7. Blood pressure reading 3 |  | Heart rate 3 |  |

| Height and weight                |  |
|----------------------------------|--|
| 1.8. Height in centimetres(cm) 1 |  |
| 1.9. Height in centimetres(cm) 2 |  |
| 1.10. Weight in kilograms (KG) 1 |  |
| 1.11. Weight in kilograms (KG) 2 |  |

| Waist and Hip circumference                  |  |
|----------------------------------------------|--|
| 1.12. Waist circumference in centimetres(cm) |  |
| 1.13. Hip circumference in centimetres(cm)   |  |
|                                              |  |

## 2. Demographic Information

### 2.1. Personal information

|                                                                                        |                    |  |
|----------------------------------------------------------------------------------------|--------------------|--|
| 2.1.1. Marital status                                                                  | Single             |  |
|                                                                                        | Married            |  |
|                                                                                        | Divorced/separated |  |
|                                                                                        | Widowed            |  |
| 2.1.2. Education                                                                       | No schooling       |  |
|                                                                                        | Primary school     |  |
|                                                                                        | High school        |  |
|                                                                                        | Completed matric   |  |
|                                                                                        | Post matric        |  |
| 2.1.3. Employment status                                                               | Employed           |  |
|                                                                                        | Unemployed         |  |
|                                                                                        | Self-employed      |  |
|                                                                                        | Pensioner          |  |
| 2.1.4. Have you ever worked in Gauteng                                                 | Yes                |  |
|                                                                                        | No                 |  |
| 2.1.5. How long have you worked in Gauteng?<br>(if yes in 2.1.4)                       |                    |  |
| 2.1.6. What was your occupation then                                                   |                    |  |
| 2.1.6. if you have not worked in Gauteng,<br>what was/is your occupation anywhere else |                    |  |
| 2.1.8. Do you receive pension grant                                                    | Yes                |  |
|                                                                                        | No                 |  |
| 2.1.9. How much is your individual income in<br>Rands/month                            | <R1000             |  |
|                                                                                        | R1001-R5000        |  |
|                                                                                        | R5001-10 000       |  |
|                                                                                        | R10 001 and more   |  |
| 2.1.10. Religion                                                                       | Christian          |  |
|                                                                                        | Non-Christian      |  |

|                                                                 |                         |  |
|-----------------------------------------------------------------|-------------------------|--|
| 2.2.1. Household head                                           | Me                      |  |
|                                                                 | Spouse                  |  |
|                                                                 | Child                   |  |
|                                                                 | Family member/relatives |  |
| 2.2.2. Who do you stay with                                     | Alone                   |  |
|                                                                 | Spouse                  |  |
|                                                                 | Children                |  |
|                                                                 | Helper                  |  |
|                                                                 | Family/relative         |  |
| 2.2.3. How many adults in the household (18 years and above)?   |                         |  |
| 2.2.4. How many adults are working?                             |                         |  |
| 2.2.5. How many adults are not working?                         |                         |  |
| 2.2.6. How many children do you have?                           |                         |  |
| 2.2.6. How many children in the household (less than 18 years)? |                         |  |
| 2.2.7. How many pensioners in the house?                        |                         |  |
| 2.2.8. How much is the household income in Rand/month           | 0-R1000                 |  |
|                                                                 | R1001-R5000             |  |
|                                                                 | R5001-R10 000           |  |
|                                                                 | R10 000 more            |  |
| 2.2.9 Type of house                                             | Brick house             |  |
|                                                                 | Mud house               |  |
| 2.2.10 Type of toilet                                           | No toilet               |  |
|                                                                 | Pit toilet              |  |
|                                                                 | Flush toilet            |  |
| 2.2.11. Do you have electricity                                 | Yes                     |  |

|                                                |                     |  |
|------------------------------------------------|---------------------|--|
|                                                | No                  |  |
| 2.2.12 What is the Method of cooking           | Firewood            |  |
|                                                | Electricity stove   |  |
|                                                | Paraffin stove      |  |
|                                                | Gas stove           |  |
| 2.2.13. Do you have water access               | Yes                 |  |
|                                                | No                  |  |
| 2.2.14. If yes where do you collect the water? | Tap inside the yard |  |
|                                                | Community tap       |  |
|                                                | Borehole            |  |
|                                                | River               |  |

### 3. Behavioral measurements

#### 3.1. Tobacco use

|                                            |           |  |
|--------------------------------------------|-----------|--|
| 3.1.1. Do you currently smoke any tobacco? | Yes       |  |
|                                            | No        |  |
| If yes in 3.1.1 which type do you smoke    | Cigarette |  |
|                                            | Cigars    |  |
|                                            | Pipes     |  |
|                                            | Snuff     |  |

#### 3.2. Alcohol Consumption

|                                                   |                  |  |
|---------------------------------------------------|------------------|--|
| 3.2.1. Do you consume alcohol                     | Yes              |  |
|                                                   | No               |  |
| 3.2.2. If yes in 3.2.1. which type do you consume | Commercial beer  |  |
|                                                   | Traditional beer |  |
|                                                   | Wine             |  |

|                                              |              |  |
|----------------------------------------------|--------------|--|
|                                              | Spirits      |  |
| 3.2.3. How often do you drink alcohol        | Occasionally |  |
|                                              | Everyday     |  |
|                                              | weekends     |  |
| 3.2.4. How much alcohol do you drink per day |              |  |

### 3.3. Diet

|                                                                        |                  |  |
|------------------------------------------------------------------------|------------------|--|
| 3.3.1. Do you eat vegetables                                           | Yes              |  |
|                                                                        | No               |  |
| 3.3.2. If yes in 3.3.1. How many times do you eat vegetables per week? | Everyday         |  |
|                                                                        | 3 times a week   |  |
|                                                                        | Once per week    |  |
|                                                                        | Only on weekends |  |
| 3.3.3. Do you eat fruits                                               | Yes              |  |
|                                                                        | No               |  |
| 3.3.4. If yes in 3.3.3 How many times do you eat fruits per week?      | Everyday         |  |
|                                                                        | 3 times a week   |  |
|                                                                        | Once per week    |  |
|                                                                        | Only on weekend  |  |

### 3.4. Dietary salt

|                                      |     |  |
|--------------------------------------|-----|--|
| 3.4.1. Do you add salt in your food? | Yes |  |
|                                      | No  |  |

## 1. Medical history

### 4.1. History of Raised Blood pressure

### 4.2. History of Diabetes

|                                                                           |     |  |
|---------------------------------------------------------------------------|-----|--|
| 4.1.1. Have you been diagnose with high blood pressure                    | Yes |  |
|                                                                           | No  |  |
| 4.1.2.If yes in 4.4.1 are you on medication for high blood pressure?      | Yes |  |
|                                                                           | No  |  |
| 4.1.3. Has any of your family members diagnosed with high blood pressure? | Yes |  |
|                                                                           | No  |  |

|                                                              |     |  |
|--------------------------------------------------------------|-----|--|
| 4.2.1.Have you been diagnose with diabetes                   | Yes |  |
|                                                              | No  |  |
| 4.2.2..If yes in 4.2.1 are you on medication for diabetes    | Yes |  |
|                                                              | No  |  |
| 4.2.3 Has any of your family members diagnosed with diabetes | Yes |  |
|                                                              | No  |  |

### **4.3. History of Cardiovascular Diseases**

|                                                                             |     |  |
|-----------------------------------------------------------------------------|-----|--|
| 4.3.1.Have you been diagnose with cardiovascular disease                    | Yes |  |
|                                                                             | No  |  |
| 4.3.2. If yes in 4.3.1. are you on medication for cardiovascular disease    | Yes |  |
|                                                                             | No  |  |
| 4.3. 3.Has any of your family members diagnosed with cardiovascular disease | Yes |  |
|                                                                             | No  |  |

**THANK YOU FOR PARTICIPATING IN THE STUDY!**
