# Supplementary material for: Utility of Obesity Indicators for Predicting Hypertension among Older Persons in Limpopo Province, South Africa
Source: MDPI journal article supplement (doi:10.3390/app12094697), 2022-05-07
Supplement: s1 [file s1]

Archive with 1 entries (1 files):
- applsci-1601612-supplementary.pdf
